# Supplementary material for: Higher-order glass-transition singularities in nano-confined states
Source: Royal Society of Chemistry journal article supplement (doi:10.1039/c7ra09049h), 2017-01-01
Supplement: c7ra09049h1.pdf [file c7ra09049h1.pdf]

## Supplementary Information

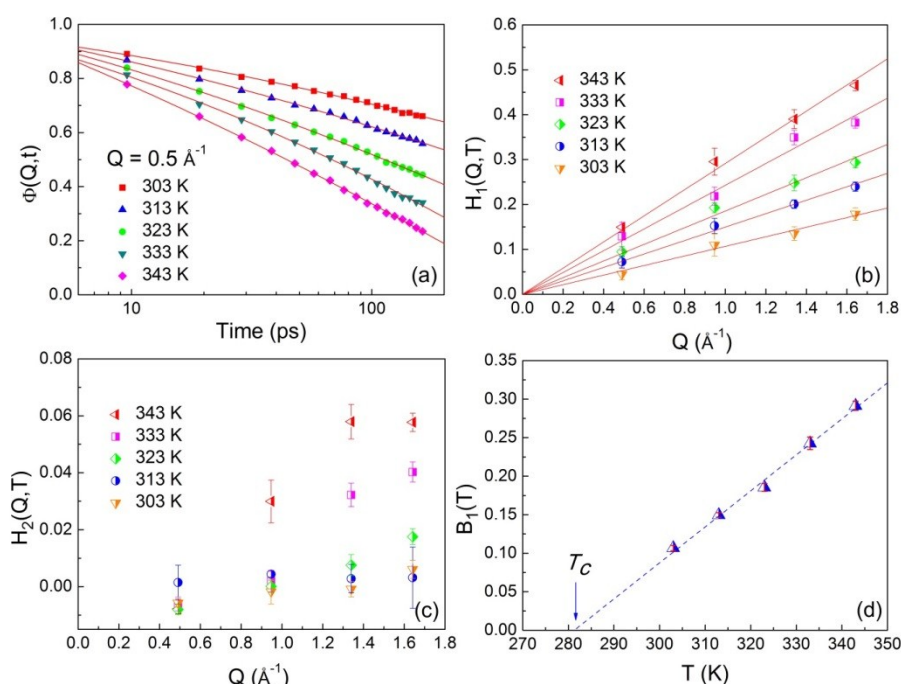

**Figure 1S.** The quasi-elastic neutron scattering data of bulk BPM. The self-intermediate scattering function measured at different temperatures (a), fitting parameter  $H_1(Q,T)$  (b) and  $H_2(Q,T)$  (c) as a function of  $Q$  at different temperatures and temperature dependence of fitting parameter  $B_1(T)$  (d).

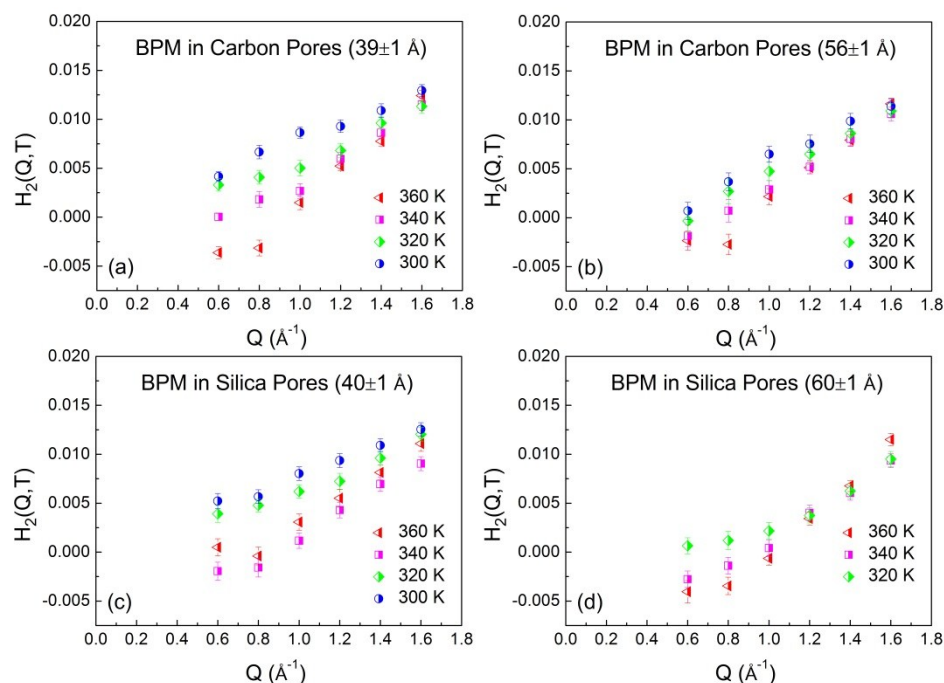

**Figure 2S.** The  $Q$  dependence of fitting parameter  $H_2(Q,T)$  for BPM confined in carbon pores ( $39 \pm 1 \text{ \AA}$ ) (a), carbon pores ( $56 \pm 1 \text{ \AA}$ ) (b), silica pores ( $40 \pm 1 \text{ \AA}$ ) (c) and silica pores ( $60 \pm 1 \text{ \AA}$ ) (d) at different temperatures.

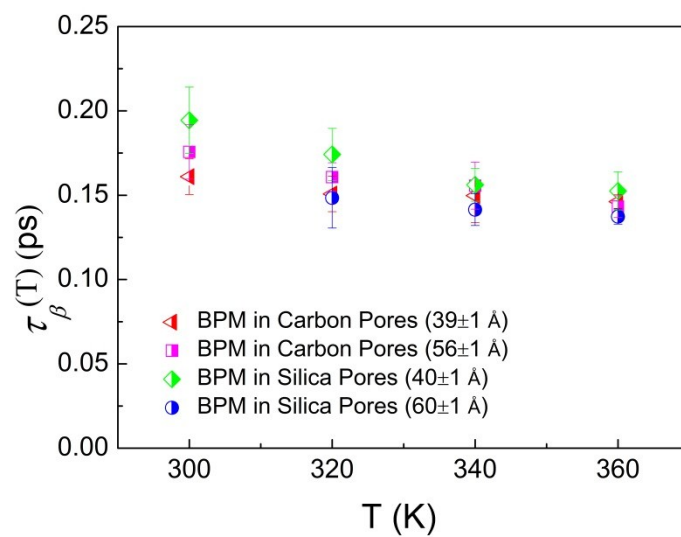

**Figure 3S.** The temperature dependence of fitting parameter  $\tau_{\beta}(T)$  for BPM confined in carbon pores ( $39\pm1$  Å and  $56\pm1$  Å) and in silica pores ( $40\pm1$  Å and  $60\pm1$  Å) at different temperatures.
